# Supplementary material for: Developing a low-cost device for estimating air–water ΔpCO 2 in coastal environments
Source: Copernicus journal article supplement (doi:10.5194/egusphere-2024-3375), 2024-11-06
Supplement: Supplementary file 1 [file egusphere-2024-3375-supplement.pdf]

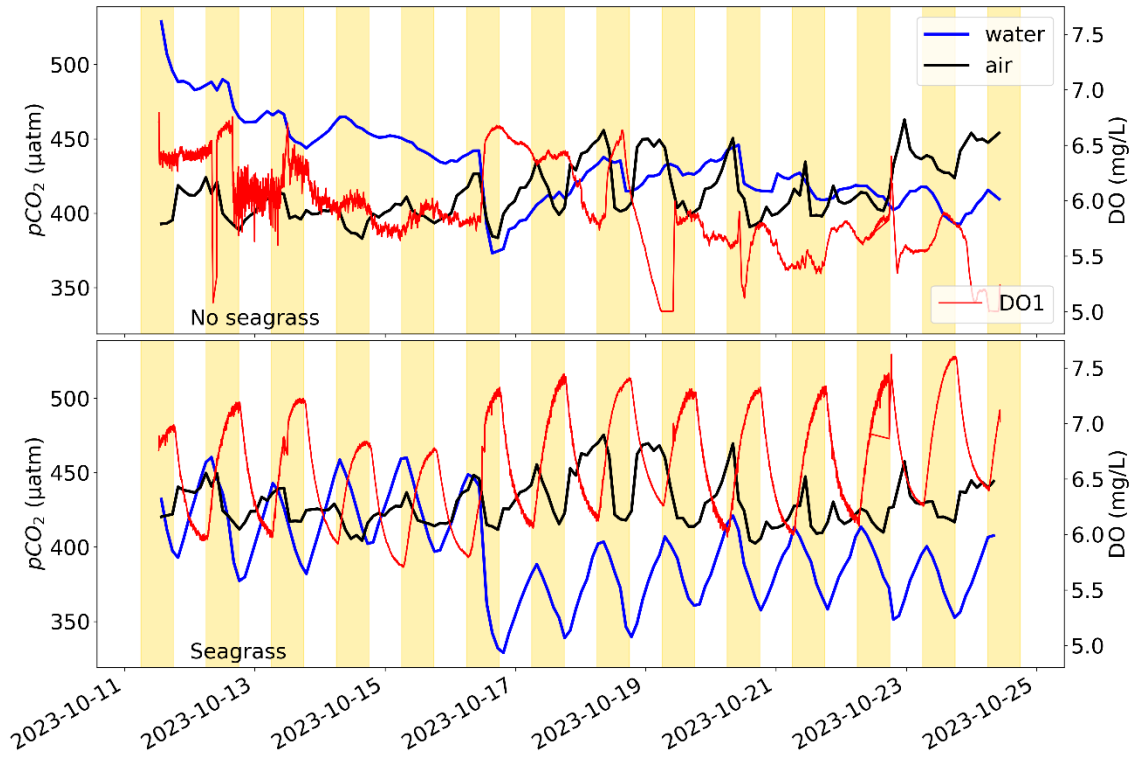

**Figure S 1. Equilibrated pCO<sub>2</sub> end points plotted for the air (black) and water-side (blue) for the tanks with and without seagrass, as labelled. Yellow background signifies “daytime,” or when the aquarium lights are illuminated, and white background signifies “nighttime,” or when lights are turned off. Dissolved oxygen (DO) is plotted in purple.**

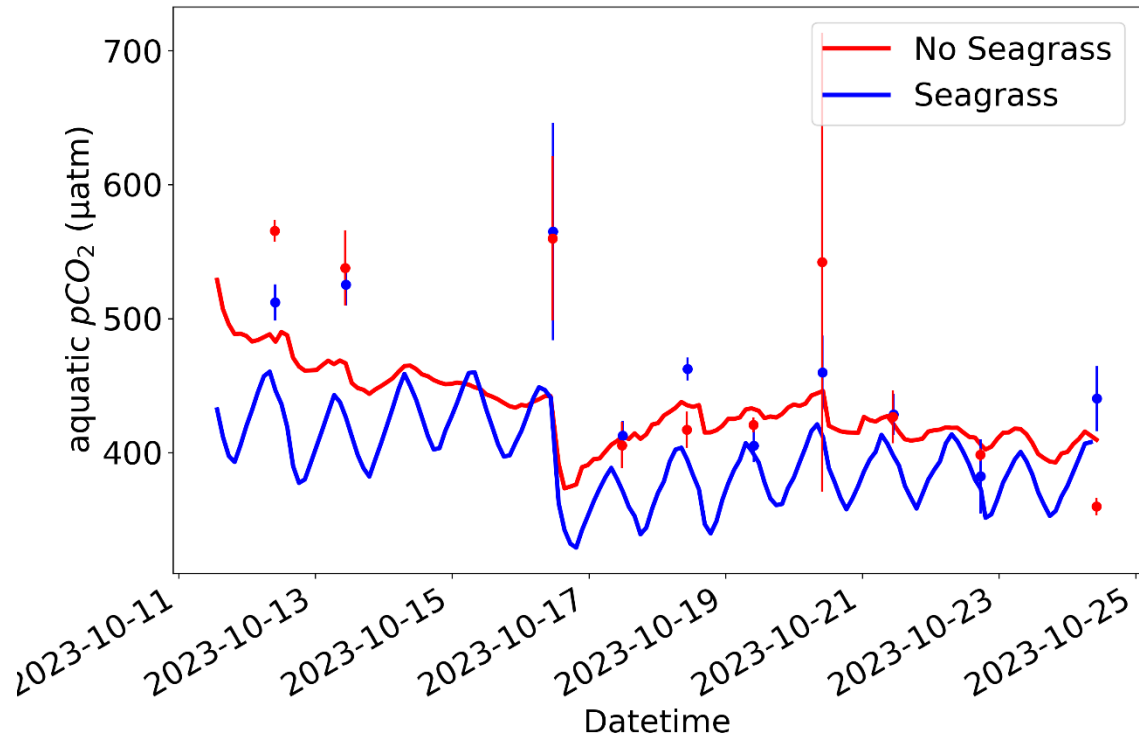

**Figure S 2.** pCO<sub>2</sub> water sample results plotted on top of the equilibrated water side points for SEACOW1 and 4. SEACOW1 was in the control tank (red), and SEACOW4 was in the seagrass tank (blue). The error bars are the standard deviation of the pCO<sub>2</sub> values.
